# Supplementary material for: Loss of Uncoupling Protein 1 Expression in the Subcutaneous Adipose Tissue Predicts Childhood Obesity
Source: MDPI journal article supplement (doi:10.3390/ijms242316706), 2023-11-24
Supplement: s1 [file s1]

**Supplemental Table S1.** Characteristics of the perinatal fatalities analyzed in this

| study* Gestational age | Sex    | Cause of death                                          |
|------------------------|--------|---------------------------------------------------------|
| 20 weeks               | male   | chorioamnionitis                                        |
| 20–23 weeks            | male   | nuchal cord, chorioamnionitis                           |
| 23 weeks               | female | stillborn, chorioamnionitis                             |
| 30.3 weeks             | male   | infarctus placentae                                     |
| 34.6 weeks             | male   | chorioamnionitis                                        |
| 36–38 weeks            | male   | intrauterine asphyxia<br>interpositional cord insertion |
| 36–37 weeks            | female | placental abruption                                     |

\* All patients were free from developmental malformations and indications of genetic disorders.

**Supplemental Table S2.** qPCR primer sequences used in this study

|                 |     |                         |
|-----------------|-----|-------------------------|
| <i>ACTB</i>     | fw  | CACCATTGGCAATGAGCGGTTC  |
|                 | rev | AGGTCTTTGCGGATGTCCACGT  |
| <i>GAPDH</i>    | fw  | GTCTCCTCTGACTTCAACAGCG  |
|                 | rev | ACCACCCTGTTGCTGTAGCCAA  |
| <i>UCP1</i>     | fw  | AGTTCCTCACCGCAGGGAAAGA  |
|                 | rev | GTAGCGAGGTTTGATTCCGTGG  |
| <i>MYOD1</i>    | fw  | CTCCAACTGCTCCGACGGCAT   |
|                 | rev | ACAGGCAGTCTAGGCTCGACAC  |
| <i>PPARGC1A</i> | fw  | CCAAAGGATGCGCTCTCGTTCA  |
|                 | rev | CGGTGTCTGTAGTGGCTTGACT  |
| <i>DIO2</i>     | fw  | TTGAGCCGCTCCAAGTCCACTC  |
|                 | rev | CTGTACTGGAGACATGCACCAC  |
| <i>MT-TQ</i>    | fw  | GATGTCAGAGGGGTGCCTTG    |
|                 | rev | AACCCTCGTTCCACAGAAGC    |
| <i>LHX8</i>     | fw  | GGACCAGCTTTACAGCAGATCAG |
|                 | rev | CGTCTGCTCAAGCCTGTCCTTT  |
| <i>FGF9</i>     | fw  | CCAGGAAAGACCACAGCCGATT  |
|                 | rev | CCATACAGCTCCCCCTTCTCAT  |
| <i>BMP3</i>     | fw  | AAGGCAACACGGTTCGCAGCTT  |
|                 | rev | GACTTGGTAGCGATGTCAGATTG |
| <i>FAM153A</i>  | fw  | CAGACAGTCTCTGAGGAAGCCA  |
|                 | rev | CTCACCGTTGTAAGTGGACAGC  |
| <i>GRB7</i>     | fw  | ACTCCACCAAGGGCACCTCTAA  |
|                 | rev | GACACAGAAACCGAAGTCAGTGG |

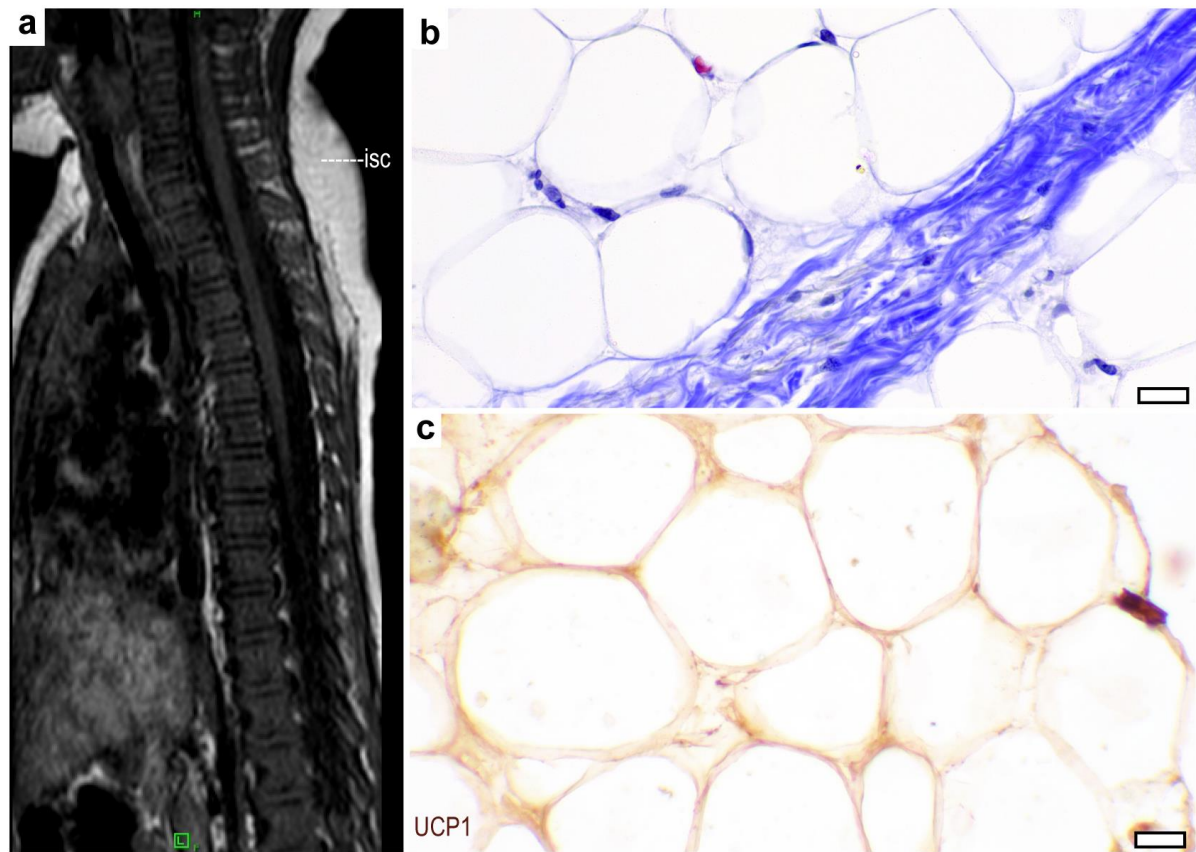

**Figure S1. Interscapular fat depot in the human infant**

(a) Sagittal MRI image of a 0.59-year-old infant, showing the position of the interscapular fat (isc). Courtesy of Dr. Veronika Gaál, University of Debrecen. (b) Masson's trichrome staining of the interscapular fat of a 1-year-old child. Scale bar 30  $\mu$ m. (c) UCP1 immunostaining of the same sample. Scale bar 30  $\mu$ m.

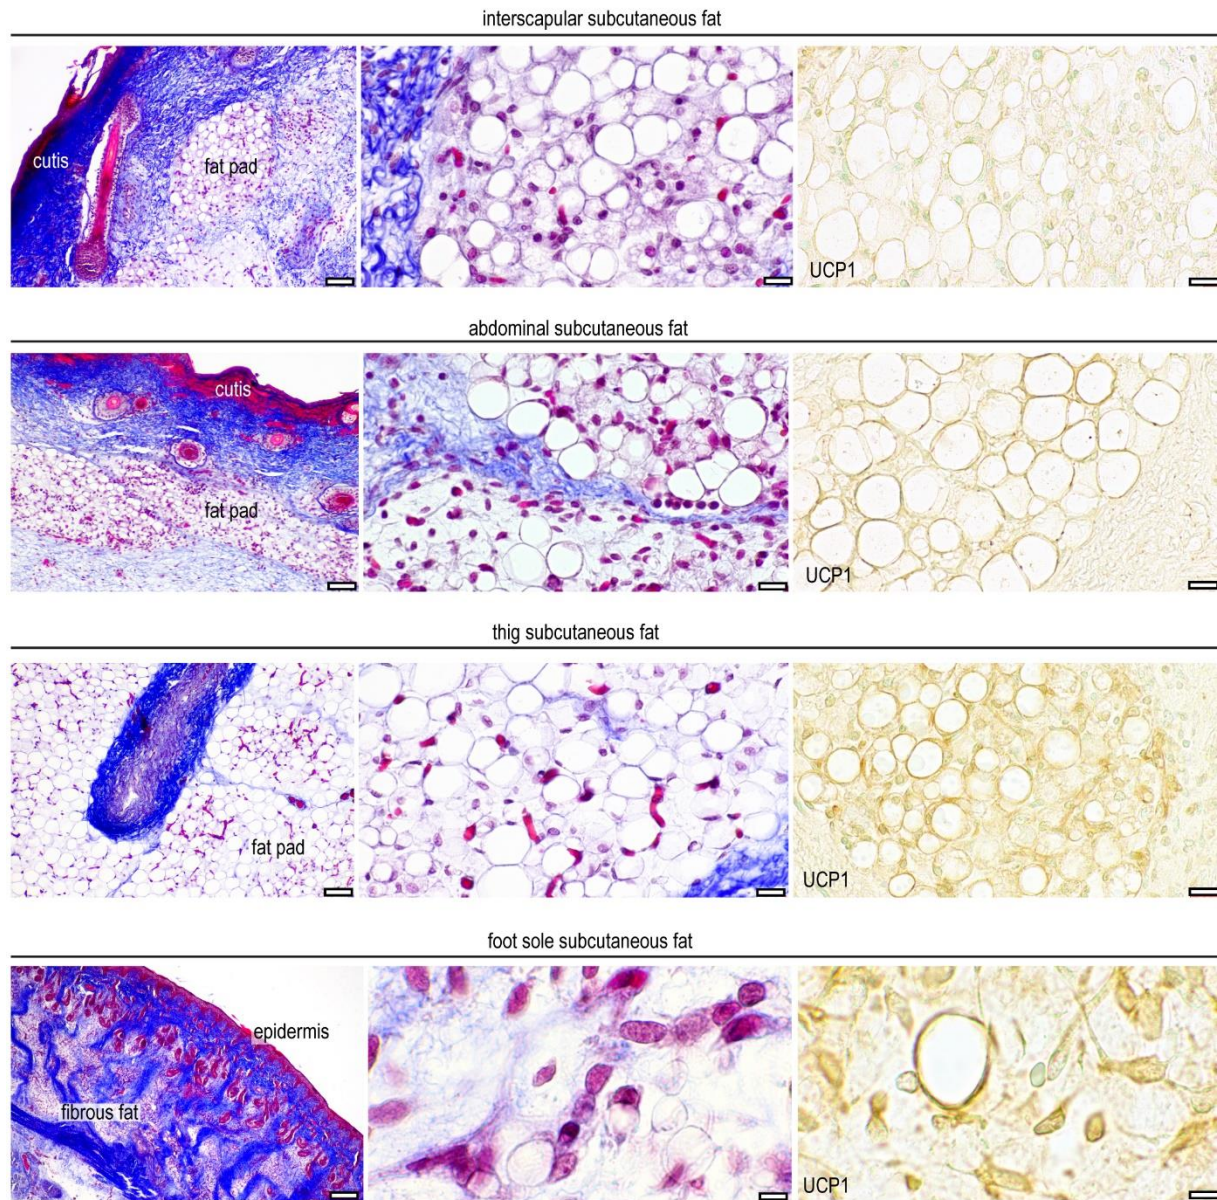

**Figure S2. Fat depots in the second trimester**

Representative Masson's trichrome and UCP1 immunostaining of various fat depots from the second trimester. Scale bar 50  $\mu$ m.



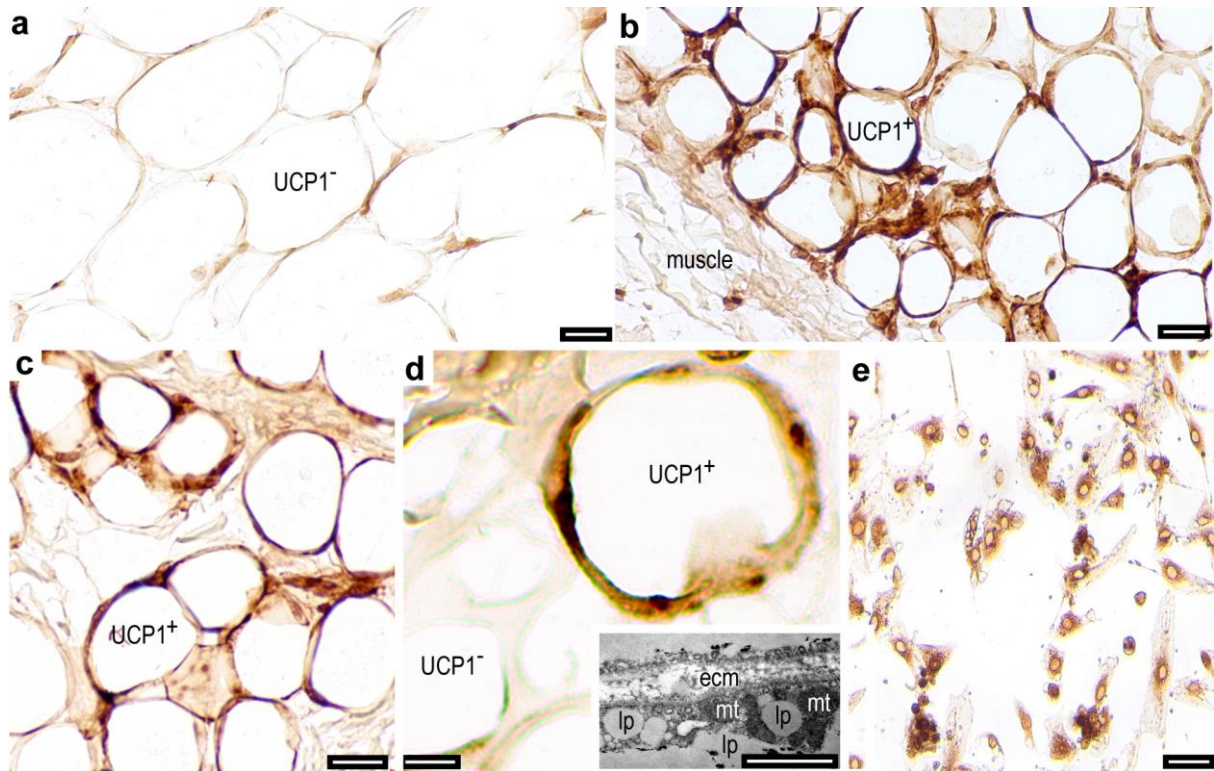

**Figure S3. UCP1 immunostaining of the abdominal wall adipose tissue**

(a) Superficial layer of the abdominal wall adipose tissue of a 6-year-old child. UCP1 immunostaining, scale bar 30  $\mu\text{m}$ . (b) Deep layer of the abdominal wall adipose tissue of the same patient. UCP1 immunostaining, scale bar 30  $\mu\text{m}$ . (c) Deep layer of the abdominal wall adipose tissue of a newborn. UCP1 immunostaining, scale bar 30  $\mu\text{m}$ . (d) Unilocular UCP1<sup>+</sup> and UCP1<sup>-</sup> adipocytes from the abdominal wall adipose tissue of a newborn, scale bar 10  $\mu\text{m}$ . *Insert:* Periphery of a unilocular adipocyte. The cytoplasm contains mitochondria (mt) and small lipid droplets (lp). ecm: extracellular matrix. Scale bar 0.5  $\mu\text{m}$ . (e) UCP1 immunostaining of *in vitro* cultured adipocytes from the inguinal subcutaneous fat from a male patient (6.5 years old). Scale bar 50  $\mu\text{m}$ . Cells were cultured as described (1, 2).

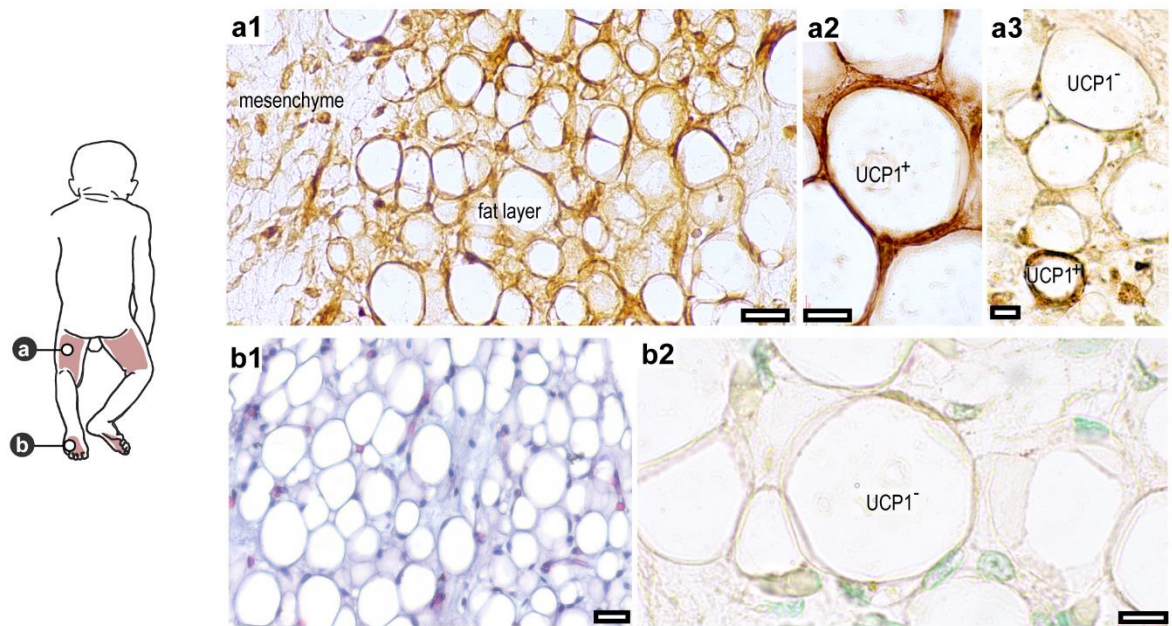

**Figure S4. Fat depot of the thigh and the foot sole in the third trimester**

(a) Thigh, (b) foot sole. **a1-a3**: UCP1 immunostaining, scale bar 100, 10, and 10  $\mu\text{m}$ , respectively. **b1**: Masson's trichrome staining, scale bar 50  $\mu\text{m}$ . **b2**: UCP1 immunostaining, scale bar 10  $\mu\text{m}$ .

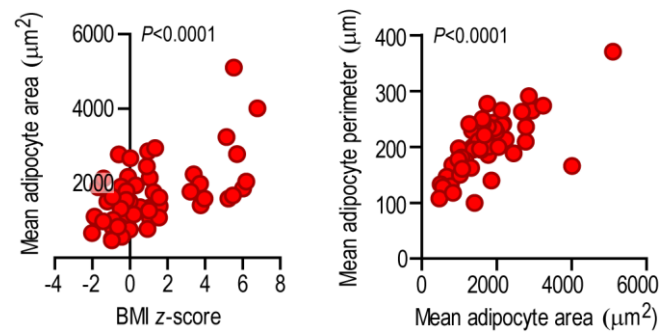

**Figure S5. Correlation of mean adipocyte size and BMI z-score**

*Left:* Correlation of mean adipocyte area measured in tissue sections and the corresponding BMI z-scores of the tissue donor patients. Each data point represents one patient. *Right:* Correlation of mean adipocyte area and perimeter. Imaging of the fat depots, such as CT or DEXA scanning cannot be employed in infants and children, hence we decided to use BMI z-score to estimate adiposity, according to WHO guidelines. Each data point represents one patient. Pearson's 2-tailed correlation analysis with 95% confidence interval.

## **References**

1. Yu H, Dilbaz S, Coßmann J, Hoang AC, Diedrich V, Herwig A, *et al.* Breast milk alkylglycerols sustain beige adipocytes through adipose tissue macrophages. *The Journal of Clinical Investigation* 2019;**129**: 2485-2499.
2. Hoang AC, Sasi-Szabó L, Pál T, Szabó T, Diedrich V, Herwig A, *et al.* Mitochondrial RNA stimulates beige adipocyte development in young mice. *Nature Metabolism* 2022;**4**: 1684-1696.
